# Supplementary material
Source: Springer Nature journal article supplement (https://www.springermedizin.de/resource/supplementary/12985_2008_474_MOESM6_ESM.pdf/9607830)

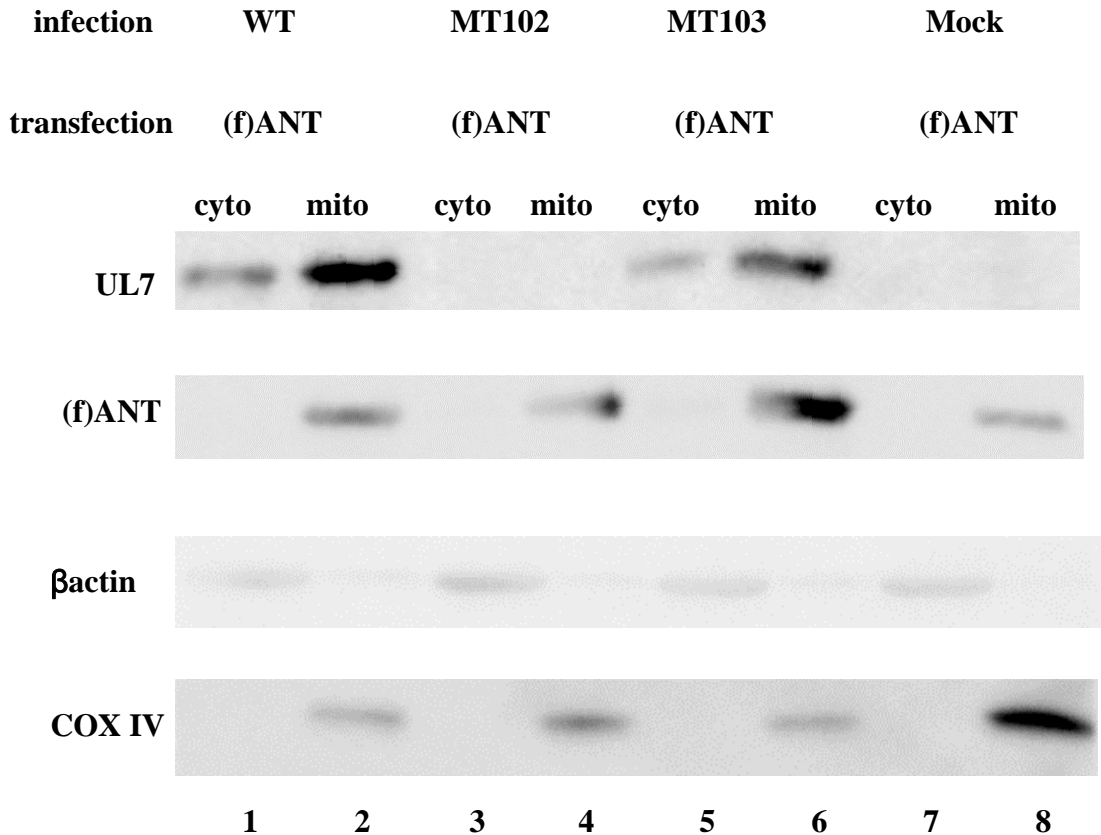

Supplement: MOESM6 [file 9607830]
